# Supplementary material for: Automatic Explanation Of Metal’s Phenomena By Application Of Artificial Neural Networks – Use Case For Hot Extruded Aluminum Alloy 6082
Source: Preprints.org preprint supplement (doi:10.20944/preprints202403.1074.v1), 2024-03-19
Supplement: Supplementary file 2 [file supplementary]

"I have a multiparametric graph showing the relationship between [...], [...], and the [...]. Can you explain how these parameters affect the efficiency?"

"This graph uses color gradients to represent data density. Can you explain the significance of darker vs. lighter areas in terms of prediction reliability?"

"I have a text file with a matrix that represents predictions, standard deviations, and data density for different parameter values. Can you help me interpret this matrix in the context of my graph?"

"How does a change in parameter X influence the outcome Y, according to this graph? And what does the standard deviation tell us about the reliability of these predictions?"

"Can you analyze the prediction, standard deviation, and data density at this specific point on the graph?"

"This graph shows varying data densities across different regions. How does data density affect the accuracy and reliability of predictions in those areas?"

"How would an increase in parameter A likely affect the prediction outcome, given the isolines shown in this graph? Can you also discuss how confidence in this prediction changes with data density?"

"The graph includes areas with both high and low standard deviations. How should I interpret these areas in terms of prediction error and data reliability?"

"Can you compare the reliability of predictions in high vs. low data density regions as illustrated by this graph?"

"Based on the analysis of this multiparametric graph, what practical recommendations can be made for optimizing the process it represents?"

"What happens to the prediction if we increase parameter A while keeping the parameter B content constant? We are currently at a point where the parameter A is [...] and parameter B is [...]."

"Explain the influence of input parameters. Explain also why."
